# Supplementary material for: Health and Economic Implications of HPV Vaccination in the United States
Source: Atypon-hosted journal article supplement (doi:10.1056/nejmsa0707052), 2008-08-20
Supplement: nejm_kim_821sa1.pdf [file nejm_kim_821sa1.pdf]

## Supplementary Appendix

This appendix has been provided by the authors to give readers additional information about their work.

Supplement to: Kim JJ, Goldie SJ. Health and economic implications of HPV vaccination in the United States. N Engl J Med 2008;359:821-32.

**Health and Economic Implications of HPV Vaccination  
in the United States**

Jane J. Kim, Sue J. Goldie

**SUPPLEMENTARY APPENDIX**

**Analytic overview of the study.** We used a flexible modeling approach that included a dynamic model, to simulate sexual transmission of HPV-16 and -18 infections between males and females, and a stochastic model, to simulate HPV-induced cervical carcinogenesis associated with all HPV types. Using population statistics, we stratified the population by gender and sexual activity level (in the dynamic model) and age (in both models). Using demographic statistics and data from epidemiological studies and cancer registries in the U.S., we parameterized the baseline model inputs. For uncertain parameters, the models were calibrated using a likelihood-based approach to fit to empirical data, primarily from the U.S. Using the calibrated dynamic model, we projected the reductions in HPV-16 and -18 incidence that would be expected over time with each HPV vaccination strategy. These estimates of reductions in HPV-16 and -18 incidence were then applied to the corresponding input parameters of HPV-16 and -18 incidence in the stochastic model, to account for the net impact of vaccination on cervical cancer outcomes associated with all HPV types. Long-term health and economic consequences were assessed for vaccination strategies that targeted preadolescent girls (i.e., 12 years of age) and included catch-up vaccination for older girls and women (i.e., to 18, 21, or 26 years of age).

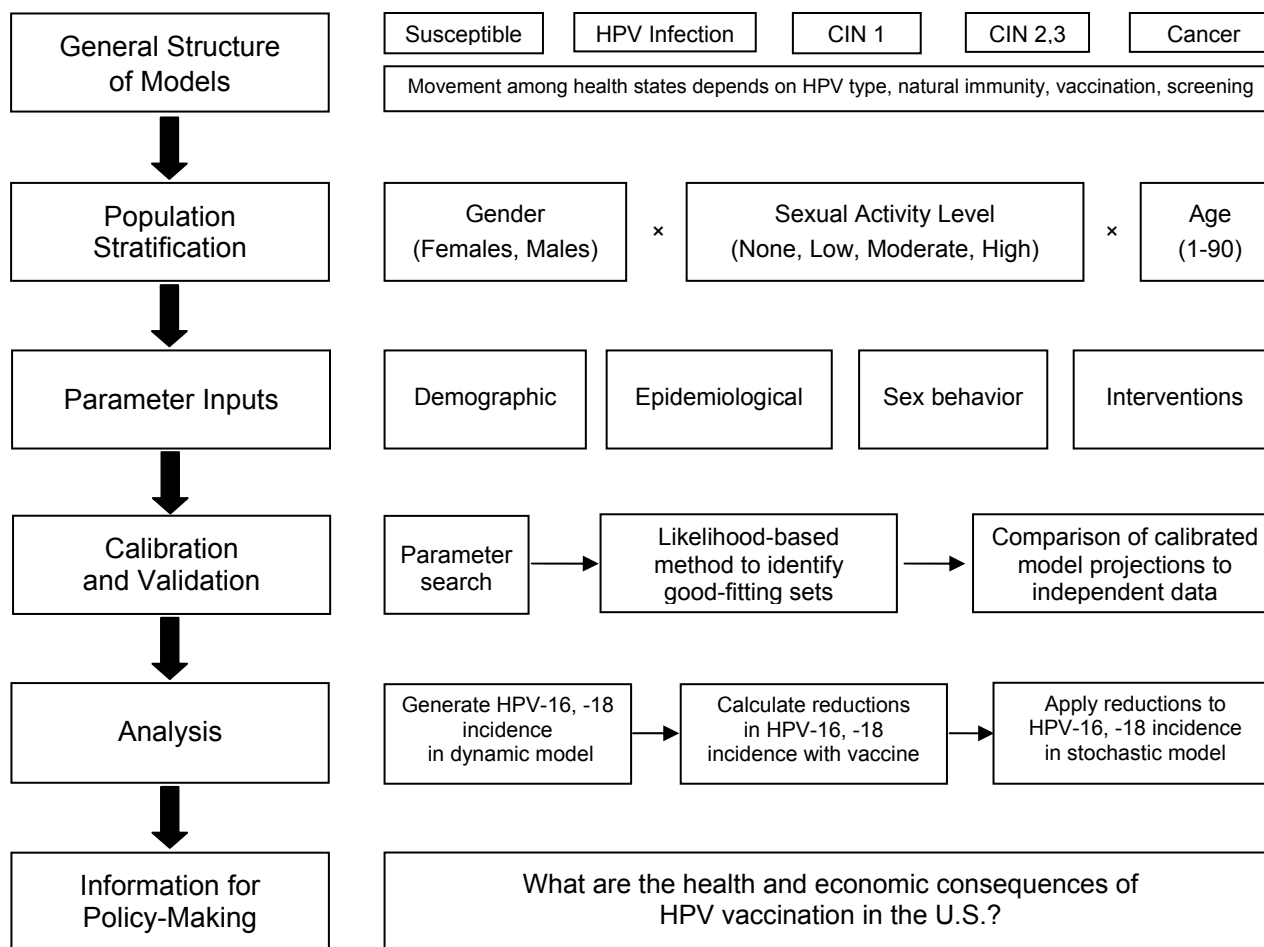

**Simplified schematic of dynamic model for females and males.** Females who are uninfected can acquire an HPV-16 or -18 infection (at an annual rate of  $\lambda_{16}$  or  $\lambda_{18}$ , respectively). Once infected, females can develop precancerous lesions (i.e., CIN1 and CIN2,3), and over time may develop invasive cervical cancer. Females who clear their infection or lesion develop a degree of natural immunity to that same HPV type (i.e., immune16 or immune18); future type-specific infections can be acquired at a reduced rate (e.g.,  $\lambda_{16}*(1-immune16)$ ). History of prior infection is tracked throughout the analysis. The model for males has a similar structure for HPV-16 and -18 infection only. Note: not all health states and transitions are shown (e.g., Prior 16+18, Dead). Once vaccination is introduced, covered females enter a corresponding vaccinated state; vaccine efficacy is modeled as protection against future type-specific infection among those without prior history of infection.

**FEMALES**

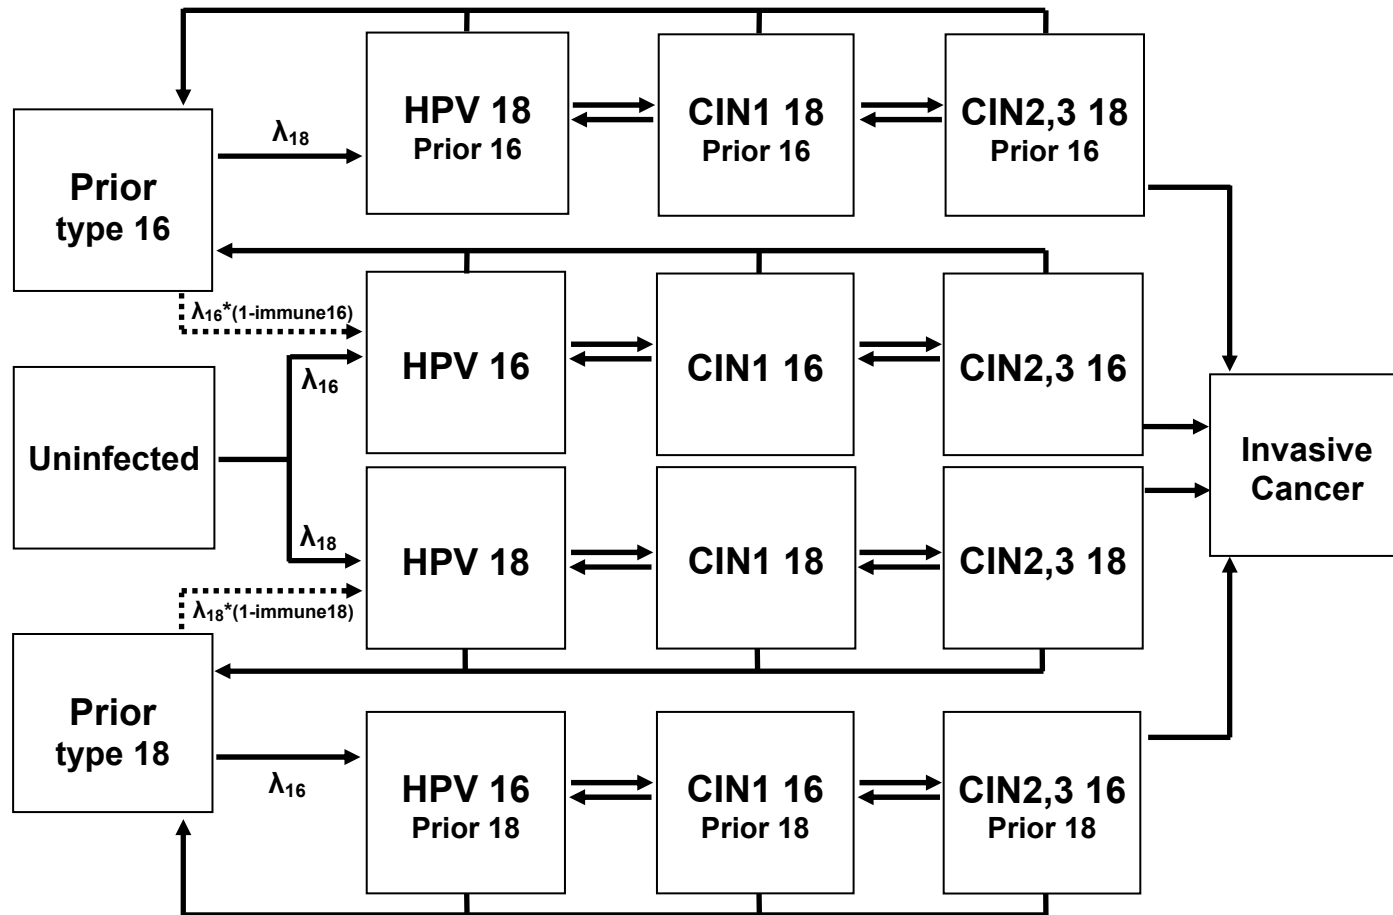

MALES

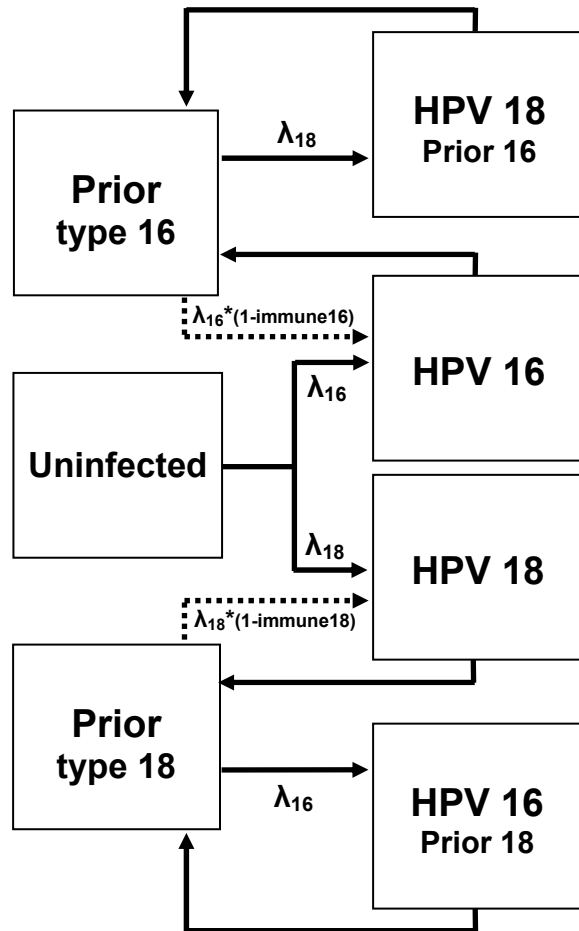

## BOUNDARY CONDITIONS

### Females

$$\begin{aligned} Sw_t(0,j) = \text{prop\_female} * \int_0^{\infty} \pi(i') * [ Sw_t(i', j) + lw16_t(i', j) + lw18_t(i', j) + L16_t(i', j) + L18_t(i', j) + H16_t(i', j) + H18_t(i', j) + CA16_t(i', j) + CA18_t(i', j) \\ + Histw16_t(i', j) + Histw18_t(i', j) + Histw1618_t(i', j) + Histw18\_I16_t(i', j) + Histw16\_I18_t(i', j) \\ + Histw18\_L16_t(i', j) + Histw16\_L18_t(i', j) + Histw18\_H16_t(i', j) + Histw16\_H18_t(i', j) + Vw_t(i', j)] di' \end{aligned}$$

### Males

$$\begin{aligned} Sm_t(0,j) = (1-\text{prop\_female}) * \int_0^{\infty} \pi(i') * [ Sw_t(i', j) + lw16_t(i', j) + lw18_t(i', j) + L16_t(i', j) + L18_t(i', j) + H16_t(i', j) + H18_t(i', j) + CA16_t(i', j) + CA18_t(i', j) \\ + Histw16_t(i', j) + Histw18_t(i', j) + Histw1618_t(i', j) + Histw18\_I16_t(i', j) + Histw16\_I18_t(i', j) \\ + Histw18\_L16_t(i', j) + Histw16\_L18_t(i', j) + Histw18\_H16_t(i', j) + Histw16\_H18_t(i', j) + Vw_t(i', j)] di' \end{aligned}$$

## STATE TRANSITION EQUATIONS

### Females

$$Sw_{t+1}(i,j) = Sw_t(i,j) + \text{prop\_female} * \pi(i) - [\lambda w16_t(i,j) + \lambda w18_t(i,j) + \text{vacc}(i) * \text{efficacy} + \mu w(i)] * Sw_t(i,j)$$

$$lw16_{t+1}(i,j) = lw16_t(i,j) + \lambda w16_t(i,j) * Sw_t(i,j) + \text{CIN1regr} * (1 - \text{CIN1clear}) * L16_t(i,j) + (1 - \text{imm\_degree16}) * \lambda w16_t(i,j) * Histw16_t(i,j) - [\text{HPVclear} + \text{HPVprog} + \text{vacc}(i) * \text{efficacy\_hx} + \mu w(i)] * lw16_t(i,j)$$

$$lw18_{t+1}(i,j) = lw18_t(i,j) + \lambda w18_t(i,j) * Sw_t(i,j) + \text{CIN1regr} * (1 - \text{CIN1clear}) * L18_t(i,j) + (1 - \text{imm\_degree18}) * \lambda w18_t(i,j) * Histw18_t(i,j) - [\text{HPVclear} + \text{HPVprog} + \text{vacc}(i) * \text{efficacy\_hx} + \mu w(i)] * lw18_t(i,j)$$

$$L16_{t+1}(i,j) = L16_t(i,j) + \text{HPVprog} * (\text{propCIN1}) * lw16_t(i,j) + \text{CIN23regr} * (1 - \text{CIN23clear}) * H16_t(i,j) - [\text{CIN1regr} + \text{CIN1prog} + \text{vacc}(i) * \text{efficacy\_hx} + \mu w(i)] * L16_t(i,j)$$

$$L18_{t+1}(i,j) = L18_t(i,j) + \text{HPVprog} * (\text{propCIN1}) * lw18_t(i,j) + \text{CIN23regr} * (1 - \text{CIN23clear}) * H18_t(i,j) - [\text{CIN1regr} + \text{CIN1prog} + \text{vacc}(i) * \text{efficacy\_hx} + \mu w(i)] * L18_t(i,j)$$

$$H16_{t+1}(i,j) = H16_t(i,j) + \text{HPVprog} * (1 - \text{propCIN1}) * lw16_t(i,j) + \text{CIN1prog} * L16_t(i,j) - [\text{CIN23regr} + \text{CIN23prog} + \text{vacc}(i) * \text{efficacy\_hx} + \mu w(i)] * H16_t(i,j)$$

$$H18_{t+1}(i,j) = H18_t(i,j) + \text{HPVprog} * (1 - \text{propCIN1}) * lw18_t(i,j) + \text{CIN1prog} * L18_t(i,j) - [\text{CIN23regr} + \text{CIN23prog} + \text{vacc}(i) * \text{efficacy\_hx} + \mu w(i)] * H18_t(i,j)$$

$$CA16_{t+1}(i,j) = CA16_t(i,j) + \text{CIN23prog} * [H16_t(i,j) + Histw18\_H16_t(i,j)] - [\mu w(i) + \mu CA] * CA16_t(i,j)$$

$$CA18_{t+1}(i,j) = CA18_{t,i,j} + CIN23prog*[H18_{t,i,j} + Histw16\_H18_{t,i,j}] - [\mu w(i) + \mu CA]*CA18_{t,i,j}$$

$$Histw16_{t+1}(i,j) = Histw16_{t,i,j} + HPVclear*lw16_{t,i,j} + CIN1 regr*CIN1clear*L16_{t,i,j} + CIN23 regr*CIN23clear*H16_{t,i,j} - [(1-imm\_degree16)*\lambda w16_{t,i,j} + \lambda w18_{t,i,j} + vacc(i)*efficacy\_hx + \mu w(i)]*Histw16_{t,i,j}$$

$$Histw18_{t+1}(i,j) = Histw18_{t,i,j} + HPVclear*lw18_{t,i,j} + CIN1 regr*CIN1clear*L18_{t,i,j} + CIN23 regr*CIN23clear*H18_{t,i,j} - [(1-imm\_degree18)*\lambda w18_{t,i,j} + \lambda w16_{t,i,j} + vacc(i)*efficacy\_hx + \mu w(i)]*Histw18_{t,i,j}$$

$$Histw1618_{t+1}(i,j) = Histw1618_{t,i,j} + HPVclear*[Histw18\_L16_{t,i,j} + Histw16\_L18_{t,i,j}] + CIN1 regr*CIN1clear*[Histw18\_L16 + Histw16\_L18] + CIN23 regr*CIN23clear*[Histw18\_H16 + Histw16\_H18] - [(1-imm\_degree16)*\lambda w16_{t,i,j} + (1-imm\_degree18)*\lambda w18_{t,i,j} + vacc(i)*efficacy\_hx + \mu w(i)]*Histw1618_{t,i,j}$$

$$Histw18\_L16_{t+1}(i,j) = Histw18\_L16_{t,i,j} + \lambda w16_{t,i,j}*Histw18_{t,i,j} + (1-imm\_degree16)*\lambda w16_{t,i,j}*Histw1618_{t,i,j} + CIN1 regr*(1-CIN1clear)*Histw18\_L16_{t,i,j} - [HPVprog + HPVclear + vacc(i)*efficacy\_hx + \mu w(i)]*Histw18\_L16_{t,i,j}$$

$$Histw16\_L18_{t+1}(i,j) = Histw16\_L18_{t,i,j} + \lambda w18_{t,i,j}*Histw16_{t,i,j} + (1-imm\_degree18)*\lambda w18_{t,i,j}*Histw1618_{t,i,j} + CIN1 regr*(1-CIN1clear)*Histw16\_L18_{t,i,j} - [HPVprog + HPVclear + vacc(i)*efficacy\_hx + \mu w(i)]*Histw16\_L18_{t,i,j}$$

$$Histw18\_L16_{t+1}(i,j) = Histw18\_L16_{t,i,j} + HPVprog*propCIN1*Histw18\_L16_{t,i,j} + CIN23 regr*(1-CIN23clear)*Histw18\_H16_{t,i,j} - [CIN1 regr + CIN1prog + vacc(i)*efficacy\_hx + \mu w(i)]*Histw18\_L16_{t,i,j}$$

$$Histw16\_L18_{t+1}(i,j) = Histw16\_L18_{t,i,j} + HPVprog*propCIN1*Histw16\_L18_{t,i,j} + CIN23 regr*(1-CIN23clear)*Histw16\_H18_{t,i,j} - [CIN1 regr + CIN1prog + vacc(i)*efficacy\_hx + \mu w(i)]*Histw16\_L18_{t,i,j}$$

$$Histw18\_H16_{t+1}(i,j) = Histw18\_H16_{t,i,j} + HPVprog*(1-propCIN1)*Histw18\_L16_{t,i,j} + CIN1prog*Histw18\_L16_{t,i,j} - [CIN23 regr + CIN23prog + vacc(i)*efficacy\_hx + \mu w(i)]*Histw18\_H16_{t,i,j}$$

$$Histw16\_H18_{t+1}(i,j) = Histw16\_H18_{t,i,j} + HPVprog*(1-propCIN1)*Histw16\_L18_{t,i,j} + CIN1prog*Histw16\_L18_{t,i,j} - [CIN23 regr + CIN23prog + vacc(i)*efficacy\_hx + \mu w(i)]*Histw16\_H18_{t,i,j}$$

$$Vw_{t+1}(i,j) = Vw_{t,i,j} + vacc(i)*efficacy*Sw_{t,i,j} + vacc(i)*efficacy\_hx*[lw16_{t+1}(i,j) + lw18_{t+1}(i,j) + L16_{t+1}(i,j) + L18_{t+1}(i,j) + H16_{t+1}(i,j) + H18_{t+1}(i,j) + Histw16_{t+1}(i,j) + Histw18_{t+1}(i,j) + Histw1618_{t+1}(i,j) + Histw18\_L16_{t+1}(i,j) + Histw16\_L18_{t+1}(i,j) + Histw18\_H16_{t+1}(i,j) + Histw16\_H18_{t+1}(i,j)] - \mu w(i)*Vw_{t,i,j}$$

### Males

$$Sm_{t+1}(i,j) = Sm_{t,i,j} + (1-prop\_female)*\pi(i) - [\lambda m16_{t,i,j} + \lambda m18_{t,i,j} + \mu m(i)]*Sm_{t,i,j}$$

$$Im16_{t+1}(i,j) = Im16_{t,i,j} + \lambda m16_{t,i,j}*Sm_{t,i,j} + (1-imm\_degree16)*\lambda m16_{t,i,j}*Histm16_{t,i,j} - [HPVclear + \mu m(i)]*Im16_{t,i,j}$$

$$Im18_{t+1}(i,j) = Im18_{t,i,j} + \lambda m18_{t,i,j}*Sm_{t,i,j} + (1-imm\_degree18)*\lambda m18_{t,i,j}*Histm18_{t,i,j} - [HPVclear + \mu m(i)]*Im18_{t,i,j}$$

$$Histm16_{t+1}(i,j) = Histm16_{t,i,j} + HPVclear*Im16_{t,i,j} - [(1-imm\_degree16)*\lambda m16_{t,i,j} + \lambda m18_{t,i,j} + \mu m(i)]*Histm16_{t,i,j}$$

$$\text{Hism18}_{t+1}(i,j) = \text{Hism18}_t(i,j) + \text{HPVclear} * \text{Im18}_t(i,j) - [(1 - \text{imm\_degree18}) * \lambda_{m18_t}(i,j) + \lambda_{m16_t}(i,j) + \mu_m(i)] * \text{Hism18}_t(i,j)$$

$$\text{Hism1618}_{t+1}(i,j) = \text{Hism1618}_t(i,j) + \text{HPVclear} * [\text{Hism18\_I16}_t(i,j) + \text{Hism16\_I18}_t(i,j)] - [(1 - \text{imm\_degree16}) * \lambda_{m16_t}(i,j) + (1 - \text{imm\_degree18}) * \lambda_{m18_t}(i,j) + \mu_m(i)] * \text{Hism1618}_t(i,j)$$

$$\text{Hism18\_I16}_{t+1}(i,j) = \text{Hism18\_I16}_t(i,j) + \lambda_{m16_t}(i,j) * \text{Hism18}_t(i,j) + (1 - \text{imm\_degree16}) * \lambda_{m16_t}(i,j) * \text{Hism1618}_t(i,j) - [\text{HPVclear} + \mu_m(i)] * \text{Hism18\_I16}_t(i,j)$$

$$\text{Hism16\_I18}_{t+1}(i,j) = \text{Hism16\_I18}_t(i,j) + \lambda_{m18_t}(i,j) * \text{Hism16}_t(i,j) + (1 - \text{imm\_degree18}) * \lambda_{m18_t}(i,j) * \text{Hism1618}_t(i,j) - [\text{HPVclear} + \mu_m(i)] * \text{Hism16\_I18}_t(i,j)$$

## FORCE OF INFECTION <sup>1</sup>

$$\lambda w16_t(i, j) = \sum_{k=1}^{90} \sum_{l=1}^4 kw(i, j) \cdot \rho w_t(i, j, k, l) \cdot \frac{\beta16 \cdot (\text{Im}16_t(k, l) + \text{Histm}18\_116_t(k, l))}{\text{Nm}_t(k, l)}$$

$$\lambda w18_t(i, j) = \sum_{k=1}^{90} \sum_{l=1}^4 kw(i, j) \cdot \rho w_t(i, j, k, l) \cdot \frac{\beta18 \cdot (\text{Im}18_t(k, l) + \text{Histm}16\_118_t(k, l))}{\text{Nm}_t(k, l)}$$

$$\lambda m16_t(i, j) = \sum_{k=1}^{90} \sum_{l=1}^4 km(i, j) \cdot \rho m_t(i, j, k, l) \cdot \frac{\beta16 \cdot (\text{Iw}16_t(k, l) + \text{L}16_t(k, l) + \text{H}16_t(k, l) + \text{Histw}18\_116_t(k, l) + \text{Histw}18\_116_t(k, l) + \text{Histw}18\_116_t(k, l))}{\text{Nw}_t(k, l)}$$

$$\lambda m18_t(i, j) = \sum_{k=1}^{90} \sum_{l=1}^4 km(i, j) \cdot \rho m_t(i, j, k, l) \cdot \frac{\beta18 \cdot (\text{Iw}18_t(k, l) + \text{L}18_t(k, l) + \text{H}18_t(k, l) + \text{Histw}16\_118_t(k, l) + \text{Histw}16\_118_t(k, l) + \text{Histw}16\_118_t(k, l))}{\text{Nw}_t(k, l)}$$

## SEXUAL MIXING MATRIX

We used a similar sexual mixing algorithm as described by Barnabas et al. (2006)<sup>1</sup>:

$$\rho w_t(i, j, k, l) = \left[ \begin{array}{c} \varepsilon_1 \cdot \frac{\sum_{l=1}^4 \text{Nm}_t(k, l) \cdot km(k, l)}{\sum_{k=1}^{90} \sum_{l=1}^4 \text{Nm}_t(k, l) \cdot km(k, l)} + (1 - \varepsilon_1) \cdot \delta(i, k) \\ \varepsilon_2 \cdot \frac{\text{Nm}_t(k, l) \cdot km(k, l)}{\sum_{l=1}^4 \text{Nm}_t(k, l) \cdot km(k, l)} + (1 - \varepsilon_2) \cdot \delta(j, l) \end{array} \right]$$

$$\rho m_t(i, j, k, l) = \left[ \begin{array}{c} \varepsilon_1 \cdot \frac{\sum_{l=1}^4 \text{Nw}_t(k, l) \cdot kw(k, l)}{\sum_{k=1}^{90} \sum_{l=1}^4 \text{Nw}_t(k, l) \cdot kw(k, l)} + (1 - \varepsilon_1) \cdot \delta(i, k) \\ \varepsilon_2 \cdot \frac{\text{Nw}_t(k, l) \cdot kw(k, l)}{\sum_{l=1}^4 \text{Nw}_t(k, l) \cdot kw(k, l)} + (1 - \varepsilon_2) \cdot \delta(j, l) \end{array} \right]$$

## DESCRIPTION OF MODEL STATE VARIABLES

|                         |                                                                                                                                          |
|-------------------------|------------------------------------------------------------------------------------------------------------------------------------------|
| <i>Females</i>          |                                                                                                                                          |
| $Sw_{t(i,j)}$           | Susceptible women (age $i$ , sexual activity group $j$ ) with no infection and no history of infection at time $t$                       |
| $Iw16_{t(i,j)}$         | Women (age $i$ , sexual activity group $j$ ) infected with HPV-16 at time $t$                                                            |
| $Iw18_{t(i,j)}$         | Women (age $i$ , sexual activity group $j$ ) infected with HPV-18 at time $t$                                                            |
| $L16_{t(i,j)}$          | Women (age $i$ , sexual activity group $j$ ) with low-grade precancerous lesion (i.e., CIN 1) associated with HPV-16 at time $t$         |
| $L18_{t(i,j)}$          | Women (age $i$ , sexual activity group $j$ ) with low-grade precancerous lesion (i.e., CIN 1) associated with HPV-18 at time $t$         |
| $H16_{t(i,j)}$          | Women (age $i$ , sexual activity group $j$ ) with high-grade precancerous lesion (i.e., CIN 2,3) associated with HPV-16 at time $t$      |
| $H18_{t(i,j)}$          | Women (age $i$ , sexual activity group $j$ ) with high-grade precancerous lesion (i.e., CIN 2,3) associated with HPV-18 at time $t$      |
| $CA16_{t(i,j)}$         | Women (age $i$ , sexual activity group $j$ ) with invasive cancer associated with HPV-16 at time $t$                                     |
| $CA18_{t(i,j)}$         | Women (age $i$ , sexual activity group $j$ ) with invasive cancer associated with HPV-18 at time $t$                                     |
| $Histw16_{t(i,j)}$      | Women (age $i$ , sexual activity group $j$ ) with history of prior HPV-16 infection and clearance at time $t$                            |
| $Histw18_{t(i,j)}$      | Women (age $i$ , sexual activity group $j$ ) with history of prior HPV-18 infection and clearance at time $t$                            |
| $Histw1618_{t(i,j)}$    | Women (age $i$ , sexual activity group $j$ ) with history of prior HPV-16 and -18 infections and clearance at time $t$                   |
| $Histw18\_I16_{t(i,j)}$ | Women (age $i$ , sexual activity group $j$ ) with HPV-16 infection who have a history of prior HPV-18 infection at time $t$              |
| $Histw16\_I18_{t(i,j)}$ | Women (age $i$ , sexual activity group $j$ ) with HPV-18 infection who have a history of prior HPV-16 infection at time $t$              |
| $Histw18\_L16_{t(i,j)}$ | Women (age $i$ , sexual activity group $j$ ) with CIN1 associated with HPV-16 who have a history of prior HPV-18 infection at time $t$   |
| $Histw16\_L18_{t(i,j)}$ | Women (age $i$ , sexual activity group $j$ ) with CIN1 associated with HPV-18 who have a history of prior HPV-16 infection at time $t$   |
| $Histw18\_H16_{t(i,j)}$ | Women (age $i$ , sexual activity group $j$ ) with CIN2,3 associated with HPV-16 who have a history of prior HPV-18 infection at time $t$ |
| $Histw16\_H18_{t(i,j)}$ | Women (age $i$ , sexual activity group $j$ ) with CIN2,3 associated with HPV-18 who have a history of prior HPV-16 infection at time $t$ |
| $Vw_{t(i,j)}$           | Vaccinated women (age $i$ , sexual activity group $j$ ) at time $t$                                                                      |
| $Nw_{t(i,j)}$           | Total number of women (age $i$ , sexual activity group $j$ ) at time $t$                                                                 |
|                         |                                                                                                                                          |
| <i>Males</i>            |                                                                                                                                          |
| $Sm_{t(i,j)}$           | Susceptible men (age $i$ , sexual activity group $j$ ) with no infection and no history of infection at time $t$                         |
| $Im16_{t(i,j)}$         | Men (age $i$ , sexual activity group $j$ ) infected with HPV-16 at time $t$                                                              |
| $Im18_{t(i,j)}$         | Men (age $i$ , sexual activity group $j$ ) infected with HPV-18 at time $t$                                                              |
| $Histm16_{t(i,j)}$      | Men (age $i$ , sexual activity group $j$ ) with history of prior HPV-16 infection and clearance at time $t$                              |
| $Histm18_{t(i,j)}$      | Men (age $i$ , sexual activity group $j$ ) with history of prior HPV-18 infection and clearance at time $t$                              |
| $Histm1618_{t(i,j)}$    | Men (age $i$ , sexual activity group $j$ ) with history of prior HPV-16 and -18 infections and clearance at time $t$                     |
| $Histm18\_I16_{t(i,j)}$ | Men (age $i$ , sexual activity group $j$ ) with HPV-16 infection who have a history of prior HPV-18 infection at time $t$                |
| $Histm16\_I18_{t(i,j)}$ | Men (age $i$ , sexual activity group $j$ ) with HPV-18 infection who have a history of prior HPV-16 infection at time $t$                |
| $Nm_{t(i,j)}$           | Total number of men (age $i$ , sexual activity group $j$ ) at time $t$                                                                   |

**DESCRIPTION AND VALUES OF MODEL PARAMETERS \***

| Variable Name          | Description                                                                                                                                                             | Values                            | Source                   |
|------------------------|-------------------------------------------------------------------------------------------------------------------------------------------------------------------------|-----------------------------------|--------------------------|
| prop_female            | proportion of females in the U.S. population at t=0                                                                                                                     | 0.5091                            | 2                        |
| $\pi(i)$               | birth rate, by age i                                                                                                                                                    | Appendix Table                    | 3                        |
| vacc(i)                | proportion of the targeted population vaccinated at age i                                                                                                               | years 1-5: 25%<br>years 6-10: 75% | assumed                  |
| efficacy               | degree of vaccine protection against future HPV-16 and -18 infections among those without prior history of type-specific infection                                      | 100%                              | 4-8                      |
| efficacy_hx            | degree of vaccine protection against future HPV-16 and -18 infections among those with prior history of type-specific infection                                         | 0%                                | 4-8                      |
| $\mu_w(i)$             | all-cause mortality rates for females in U.S., by age i                                                                                                                 | 0.00010 – 0.12465 †               | 9                        |
| $\mu_m(i)$             | all-cause mortality rates for males in U.S., by age i                                                                                                                   | 0.00011 – 0.16206 †               | 9                        |
| $\mu_{CA}$             | excess mortality rate for females with invasive cancer                                                                                                                  | 0.0646                            | 10                       |
| $\lambda_{w16_t(i,j)}$ | force of HPV-16 infection among women (age i, sexual activity group j) at time t                                                                                        | calculated by model               |                          |
| $\lambda_{w18_t(i,j)}$ | force of HPV-18 infection among women (age i, sexual activity group j) at time t                                                                                        | calculated by model               |                          |
| $\lambda_{m16_t(i,j)}$ | force of HPV-16 infection among men (age i, sexual activity group j) at time t                                                                                          | calculated by model               |                          |
| $\lambda_{m18_t(i,j)}$ | force of HPV-18 infection among men (age i, sexual activity group j) at time t                                                                                          | calculated by model               |                          |
| $k_w(i,j)$             | number of new partners per year for women (age i, sexual activity group j)                                                                                              | Appendix Table                    | 11                       |
| $k_m(i,j)$             | number of new partners per year for men (age i, sexual activity group j)                                                                                                | Appendix Table                    | 11                       |
| $\rho_w(i,j,k,l)$      | mixing matrix for women, representing the probability that women of age i and sexual activity group j forms a partnership with men of age k and sexual activity group l | calculated by model               | 1                        |
| $\rho_m(i,j,k,l)$      | mixing matrix for men, representing the probability that men of age i and sexual activity group j forms a partnership with women of age k and sexual activity group l   | calculated by model               | 1                        |
| $\beta_{16}$           | transmission probability of HPV-16 infection per infected-susceptible partnership                                                                                       | 0.823 ‡                           | calibrated               |
| $\beta_{18}$           | transmission probability of HPV-18 infection per infected-susceptible partnership                                                                                       | 0.691 ‡                           | calibrated               |
| $\epsilon_1$           | mixing coefficient by age (0=assortative; 1=random)                                                                                                                     | 0.3                               | assumed                  |
| $\epsilon_2$           | mixing coefficient by sexual activity group (0=assortative; 1=random)                                                                                                   | 0.3                               | assumed                  |
| $\delta(i,k)$          | identity matrix for age                                                                                                                                                 | 1 if i=k; 0 otherwise             |                          |
| $\delta(j,l)$          | identity matrix for sexual activity group                                                                                                                               | 1 if j=l; 0 otherwise             |                          |
| HPVprog                | probability of progression from HPV to CIN1 or CIN2,3 §                                                                                                                 | 0.0667                            | 12-15                    |
| propCIN1               | proportion of women who progress from HPV to CIN1 (versus CIN2,3)                                                                                                       | 0.90                              | assumed<br>1, 14         |
| HPVclear               | probability of HPV-16 and HPV-18 clearance                                                                                                                              | 0.3438                            | calibrated<br>14, 16, 17 |

**DESCRIPTION OF MODEL PARAMETERS (CONT) \***

|              |                                                                                |                     |                          |
|--------------|--------------------------------------------------------------------------------|---------------------|--------------------------|
| CIN1prog(i)  | probability of progression from CIN1 to CIN2,3, by age i                       | 0.0167 – 0.6000 †   | 18-21                    |
| CIN1regr     | probability of regression from CIN1                                            | 0.2667              | 14, 15, 17               |
| CIN1clear    | proportion of women who regress from CIN1 and clear their HPV infection        | 0.70                | assumed                  |
| CIN23prog(i) | probability of progression from CIN2,3 to invasive cancer, by age i            | 0.0020 – 0.0301 † ¶ | calibrated<br>10, 14, 17 |
| CIN23regr    | probability of regression from CIN2,3                                          | 0.0583              | 14, 15, 17               |
| CIN23clear   | proportion of women who regress from CIN2,3 and clear their HPV infection      | 0.70                | assumed                  |
| imm_degree16 | degree of natural immunity following HPV-16 infection and clearance (lifelong) | 0.7550 #            | calibrated               |
| imm_degree18 | degree of natural immunity following HPV-18 infection and clearance (lifelong) | 0.6976 #            | calibrated               |

\* HPV, human papillomavirus; CIN, cervical intraepithelial neoplasia. Probabilities are annual unless otherwise noted.

† Range represents age-specific probabilities.

‡ In the calibration process, baseline probability was allowed to vary from 0.1 to 1.0.

§ A proportion of females (10%) with HPV who progress to CIN 1 transition directly to CIN 2,3.

|| In the calibration process, a baseline probability of 0.2667 was allowed to vary by a factor of 0-2.

¶ In the calibration process, baseline probabilities of 0.002-0.030 (by age) were allowed to vary by a factor of 1-6.

# Natural immunity represents the degree of protection individuals face against future type-specific infection after first infection and clearance; the values for type-specific natural immunity were obtained from a separate calibration exercise using the stochastic model.

## U.S. DEMOGRAPHIC DATA

| Age   | Population Size (2000) <sup>2</sup> |            | Fertility Rate (2006) <sup>3</sup><br>(annual, per woman) |
|-------|-------------------------------------|------------|-----------------------------------------------------------|
|       | Males                               | Females    |                                                           |
| 0-4   | 9,831,175                           | 9,386,999  | --                                                        |
| 5-9   | 10,488,829                          | 9,994,277  | --                                                        |
| 10-14 | 10,560,818                          | 10,047,597 | 0.0006                                                    |
| 15-19 | 10,412,689                          | 9,837,270  | 0.0419                                                    |
| 20-24 | 9,821,860                           | 9,363,203  | 0.1059                                                    |
| 25-29 | 9,785,399                           | 9,531,418  | 0.1168                                                    |
| 30-34 | 10,372,884                          | 10,214,189 | 0.0977                                                    |
| 35-39 | 11,304,995                          | 11,343,359 | 0.0473                                                    |
| 40-44 | 11,179,973                          | 11,355,395 | 0.0094                                                    |
| 45-49 | 9,959,477                           | 10,271,081 | 0.0006                                                    |
| 50-54 | 8,706,996                           | 9,083,620  | 0.0006                                                    |
| 55-59 | 6,553,207                           | 7,005,944  | --                                                        |
| 60-64 | 5,165,703                           | 5,699,027  | --                                                        |
| 65-69 | 4,402,844                           | 5,131,111  | --                                                        |
| 70-74 | 3,904,321                           | 4,945,625  | --                                                        |
| 75-79 | 3,051,227                           | 4,374,151  | --                                                        |
| 80+   | 3,093,305                           | 6,158,663  | --                                                        |

## PROPORTION OF FEMALES AND MALES IN EACH SEXUAL ACTIVITY GROUP BY AGE

| Age (years)    | Sexual Activity Group (Number of New Partners Per Year) <sup>11</sup> |           |                |           |
|----------------|-----------------------------------------------------------------------|-----------|----------------|-----------|
|                | None (0)                                                              | Low (1-2) | Moderate (3-4) | High (5+) |
| <b>FEMALES</b> |                                                                       |           |                |           |
| 8-12           | 0.990                                                                 | 0.010     | 0              | 0         |
| 13-14          | 0.940                                                                 | 0.060     | 0              | 0         |
| 15-17          | 0.502                                                                 | 0.331     | 0.070          | 0.097     |
| 18-19          | 0.171                                                                 | 0.506     | 0.136          | 0.188     |
| 20-24          | 0.087                                                                 | 0.656     | 0.126          | 0.132     |
| 25-29          | 0.025                                                                 | 0.803     | 0.094          | 0.077     |
| 30-34          | 0.018                                                                 | 0.858     | 0.056          | 0.068     |
| 35-39          | 0.010                                                                 | 0.865     | 0.061          | 0.064     |
| 40-49          | 0.013                                                                 | 0.886     | 0.034          | 0.067     |
| <b>MALES</b>   |                                                                       |           |                |           |
| 8-12           | 0.990                                                                 | 0.010     | 0              | 0         |
| 13-14          | 0.940                                                                 | 0.060     | 0              | 0         |
| 15-17          | 0.524                                                                 | 0.314     | 0.084          | 0.077     |
| 18-19          | 0.247                                                                 | 0.423     | 0.162          | 0.168     |
| 20-24          | 0.090                                                                 | 0.559     | 0.127          | 0.224     |
| 25-29          | 0.047                                                                 | 0.738     | 0.066          | 0.149     |
| 30-34          | 0.027                                                                 | 0.795     | 0.068          | 0.111     |
| 35-39          | 0.019                                                                 | 0.842     | 0.050          | 0.090     |
| 40-49          | 0.018                                                                 | 0.836     | 0.055          | 0.092     |

## DYNAMIC MODEL CALIBRATION APPROACH

Four uncertain natural history parameters were selected for calibration: (1) transmission probability of HPV-16 per infected-susceptible partnership, (2) transmission probability of HPV-18 per infected-susceptible partnership, (3) clearance of HPV-16 and -18 infection, and (4) progression of CIN 2,3 to invasive cancer. For the transmission probabilities of HPV-16 and -18, we searched across a range of prior probabilities from 0.10 to 1.0; for HPV clearance and CIN 2,3 progression, we identified a plausible range of values using data from the published literature.<sup>10, 14, 16, 17</sup> Because we used two distinct models for this analysis, we carefully examined the consistency of parameter values and assumptions between the two models. The most important of these included type-specific immunity following clearance of first infection; we first estimated these values in a separate calibration exercise using our stochastic model, and then held these values constant in both models.

More than 100,000 model simulations were run in the absence of any vaccination or screening intervention. For each simulation, one value for each of the four parameters was randomly selected from a uniform distribution over the identified plausible ranges, creating a unique natural history parameter set. Model outcomes using each parameter set were scored according to their simultaneous fit with calibration targets that were based primarily on data from epidemiological studies and cancer registries in the U.S. (see **Calibration Target Data Table** below).

We specified likelihood functions for all calibration targets, assuming that each followed an independent normal distribution. For each of the 100,000+ parameter sets, we computed a composite goodness-of-fit score by summing over the individual log likelihood measures of all targets. Using a likelihood-ratio test, we identified the parameter sets that were statistically indistinguishable from the best-fitting parameter set; 1,397 parameter sets were identified, and were therefore deemed “good-fitting”.

In order to proceed with the base case analysis, we selected a parameter set that represents the average values of all four calibrated parameters in the dynamic model, across all 1,397 “good-fitting” sets (see table below for comparison).

### CALIBRATED PARAMETER VALUES \*

| Variable                                                          | Baseline Probability | Parameter Search Range | Mean values from good-fitting sets (n=1,397) | Selected set for base case |
|-------------------------------------------------------------------|----------------------|------------------------|----------------------------------------------|----------------------------|
| Transmission probability per infected-susceptible partnership     |                      |                        |                                              |                            |
| – HPV-16                                                          | 0.5                  | 0.1 – 1.0              | 0.832                                        | 0.823                      |
| – HPV-18                                                          | 0.5                  | 0.1 – 1.0              | 0.685                                        | 0.691                      |
| HPV clearance (HPV-16 and -18) <sup>14, 16, 17</sup>              | 0.267                | 0 – 2 †                | 1.315                                        | 1.289                      |
| CIN 2,3 to invasive cancer (HPV-16 and -18) <sup>10, 14, 17</sup> | 0.002 – 0.030 ‡      | 1 – 6 †                | 1.018                                        | 1.002                      |

\* HPV, human papillomavirus; CIN, cervical intraepithelial neoplasia. Baseline probabilities are annual probabilities.

† Values represent factors that were multiplied to the baseline probability.

‡ Range represents age-specific probabilities.

## DYNAMIC MODEL CALIBRATION TARGET DATA\*

| Calibration Target                                                          | Mean (SD)               | Mean (SD)       |
|-----------------------------------------------------------------------------|-------------------------|-----------------|
| <b>Prevalence of HPV infection among women</b> <sup>22-24</sup>             | <b>HPV-16 †</b>         | <b>HPV-18 †</b> |
| – 14-19 years                                                               | 0.0390 (0.0078)         | 0.0147 (0.0048) |
| – 20-24 years                                                               | 0.0759 (0.0198)         | 0.0295 (0.0121) |
| – 25-29 years                                                               | 0.0487 (0.0165)         | 0.0211 (0.0101) |
| – 30-39 years                                                               | 0.0471 (0.0120)         | 0.0201 (0.0077) |
| – 40-49 years                                                               | 0.0415 (0.0114)         | 0.0173 (0.0071) |
| – 50-59 years                                                               | 0.0336 (0.0114)         | 0.0146 (0.0069) |
| <b>Incidence rate of invasive cancer (per 100,000)</b> <sup>23, 25-27</sup> | <b>HPV-16 and -18 †</b> |                 |
| – 20-24 years                                                               | 2.0 (1.0)               |                 |
| – 25-29 years                                                               | 10.4 (4.2)              |                 |
| – 30-34 years                                                               | 22.2 (6.0)              |                 |
| – 35-39 years                                                               | 28.1 (6.3)              |                 |
| – 40-44 years                                                               | 34.7 (6.2)              |                 |
| – 45-49 years                                                               | 35.6 (6.3)              |                 |
| – 50-54 years                                                               | 39.2 (7.6)              |                 |
| – 55-59 years                                                               | 41.9 (6.0)              |                 |
| – 60-64 years                                                               | 47.1 (8.7)              |                 |
| – 65-69 years                                                               | 51.2 (10.9)             |                 |
| – 70-74 years                                                               | 50.4 (12.0)             |                 |
| – 75-79 years                                                               | 48.6 (15.0)             |                 |
| <b>Prevalence of HPV infection among men</b> <sup>28</sup>                  | <b>HPV-16 and -18</b>   |                 |
| – 25-29 years                                                               | 0.1000 (0.0255)         |                 |
| – 30-34 years                                                               | 0.0500 (0.0255)         |                 |
| – 35-39 years                                                               | 0.0250 (0.0128)         |                 |
| – 40-44 years                                                               | 0.0550 (0.0179)         |                 |
| – 45-49 years                                                               | 0.0450 (0.0179)         |                 |
| – 50-54 years                                                               | 0.0300 (0.0153)         |                 |
| – 55-59 years                                                               | 0.0375 (0.0140)         |                 |
| – 60-64 years                                                               | 0.0275 (0.0140)         |                 |

\* SD, standard deviation; HPV, human papillomavirus; CIN, cervical intraepithelial neoplasia. All target data were assumed to follow normal distributions.

† To establish calibration targets of HPV prevalence and cervical cancer incidence associated with HPV types 16 and 18, we utilized data on type distribution of HPV-16 and -18 infections among U.S. women with no lesions<sup>23, 24</sup> and among U.S. women with invasive cervical cancer<sup>23, 25, 26</sup> and applied these proportions to HPV prevalence and cervical cancer incidence associated with all HPV types.<sup>22, 27</sup>

## LINKAGE OF DYNAMIC MODEL TO STOCHASTIC MODEL

We utilized two distinct mathematical models in a “hybrid” approach.<sup>29</sup> The dynamic model was run under various scenarios of vaccination over time (i.e., no vaccination, targeted pre-adolescent vaccination, and catch-up vaccination), and age-specific incidence for HPV-16 and -18 infections were generated each year using the force of infection ( $\lambda$ ) equations above.

We projected the reductions in HPV-16 and -18 incidences over the lifetimes of each sexually-active birth cohort over the first 10 years of the vaccination program, compared to no vaccination, regardless of whether or not they received the vaccine (in order to capture herd immunity in unvaccinated individuals; see Vaccine Analysis section below for more details). Reductions in age-specific HPV-16 and -18 incidence calculated from the dynamic model were then applied directly to the age-specific HPV-16 and -18 incidence inputs of the stochastic model (see simplified model schematic of stochastic model and linkage in the **Figure** below).

Details of the stochastic model structure, assumptions, and calibration are documented elsewhere.<sup>30</sup> Briefly, the stochastic model was calibrated using a similar likelihood-based approach and has a similar structure to the dynamic model, but offers the following key features: (1) only females are represented; (2) other HPV types are included, categorized as other (non-16,-18) high-risk types and low-risk types; (3) HPV incidence is a function of age and individual-level characteristics, but does not explicitly change over time in response to sexual activity and population prevalence; (4) it is an individual-based model, which reflects detailed heterogeneities among females, such as history of screening and/or treatment, and keeps track of individual-level expenditures; (5) it is stochastic, thereby able to capture variability as well as uncertainty; and (6) analyses can be run with a single birth cohort or multiple birth cohorts.<sup>30,31</sup>

Equations for the dynamic model were written and solved in Matlab; equations for the stochastic model were written and solved in C++.

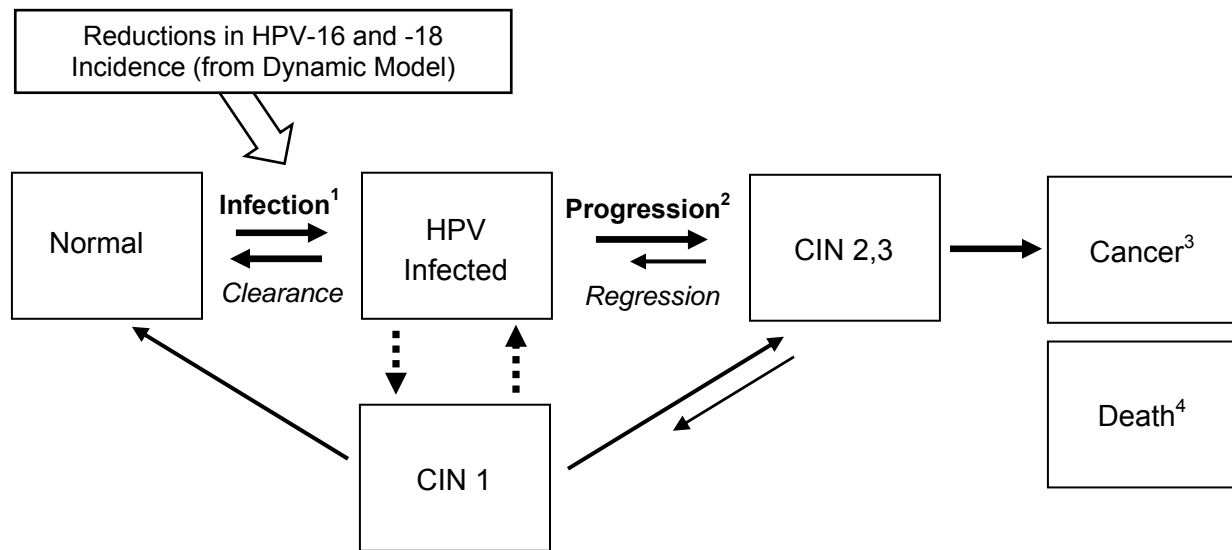

<sup>1</sup> Incidence of infection depends on age, HPV type, prior infection, and type-specific immunity.

<sup>2</sup> Progression of HPV infection and CIN 1 depends on age and HPV type.

<sup>3</sup> Cancer states stratified by stage (i.e., local, regional, distant) and detection status (i.e., undetected, symptom-detected, screen-detected).

<sup>4</sup> Death can occur from all-cause mortality from every health state and excess cancer-specific mortality from cancer states.

## STOCHASTIC MODEL CALIBRATION

Parameter calibration of the stochastic model followed a similar approach as for the dynamic model, except for the following features: (1) we varied all natural history input parameters simultaneously; (2) the calibration targets were associated with all HPV types, including other high-risk and low-risk types; and (3) we searched over 1 million natural history parameter sets and selected the best-fitting set.

### CALIBRATED PARAMETER VALUES FOR BEST-FITTING SET\*

| Variable                                                        | Baseline Values † | Parameter Search Range ‡ | Best-Fitting Parameter Set |
|-----------------------------------------------------------------|-------------------|--------------------------|----------------------------|
| HPV incidence <sup>14, 17, 32-35</sup>                          |                   |                          |                            |
| HPV-16                                                          | 0.0001 – 0.0100   | 0.1 – 8.0                | 4.747                      |
| HPV-18                                                          | 0.0001 – 0.0100   | 0.1 – 8.0                | 1.760                      |
| HPV other high-risk                                             | 0.0001 – 0.0100   | 0.1 – 8.0                | 4.563                      |
| HPV low-risk                                                    | 0.0001 – 0.0100   | 0.1 – 8.0                | 6.844                      |
| Progression of HPV incidence to CIN 1 <sup>12-15, 17, 36</sup>  |                   |                          |                            |
| HPV-16                                                          | 0.0047 – 0.0085   | 0.1 – 6.0                | 3.738                      |
| HPV-18                                                          | 0.0047 – 0.0085   | 0.1 – 6.0                | 1.136                      |
| HPV other high-risk                                             | 0.0047 – 0.0085   | 0.1 – 6.0                | 2.745                      |
| HPV low-risk                                                    | 0.0046 – 0.0054   | 0.1 – 6.0                | 0.398                      |
| Proportion of women with HPV who transition directly to CIN 2,3 |                   |                          |                            |
| HPV-16                                                          | 0.10              | 0.1 – 1.0                | 0.619                      |
| HPV-18                                                          | 0                 | 0 – 0.10                 | 0.007                      |
| HPV other high-risk                                             | 0                 | 0 – 0.10                 | 0.055                      |
| HPV low-risk                                                    | 0                 | 0 – 0.10                 | 0.028                      |
| Progression of CIN 1 to CIN 2,3 <sup>18-21, 37, 38</sup>        |                   |                          |                            |
| HPV-16                                                          | 0.0001 – 0.0039   | 0.1 – 6.0                | 1.927                      |
| HPV-18                                                          | 0.0001 – 0.0039   | 0.1 – 6.0                | 4.552                      |
| HPV other high-risk                                             | 0.0001 – 0.0039   | 0.1 – 6.0                | 2.645                      |
| HPV low-risk                                                    | 0.00001 – 0.0008  | 0.1 – 6.0                | 0.421                      |
| Progression of CIN 2,3 to invasive cancer <sup>10, 14, 17</sup> |                   |                          |                            |
| HPV-16                                                          | 0.00001 – 0.0060  | 0.5 – 6.0                | 4.808                      |
| HPV-18                                                          | 0.00001 – 0.0060  | 0.5 – 6.0                | 2.973                      |
| HPV other high-risk                                             | 0.00001 – 0.0060  | 0.5 – 4.0                | 1.719                      |
| HPV clearance <sup>14, 16, 17</sup>                             |                   |                          |                            |
| HPV-16                                                          | 0.0305            | 0.5 – 8.0                | 6.732                      |
| HPV-18                                                          | 0.0305            | 0.5 – 8.0                | 7.959                      |
| HPV other high-risk                                             | 0.0305            | 0.5 – 8.0                | 7.731                      |
| HPV low-risk                                                    | 0.0305            | 0.5 – 8.0                | 4.057                      |

### CALIBRATED PARAMETER VALUES FOR BEST-FITTING SET (CONT)\*

| Variable                                                                                                         | Baseline Values † | Parameter Search Range ‡ | Best-Fitting Parameter Set |
|------------------------------------------------------------------------------------------------------------------|-------------------|--------------------------|----------------------------|
| CIN 1 regression <sup>14, 15, 17 37</sup> §                                                                      |                   |                          |                            |
| HPV-16                                                                                                           | 0.0305            | 0.5 – 6.0                | 3.412                      |
| HPV-18                                                                                                           | 0.0305            | 0.5 – 6.0                | 4.234                      |
| HPV other high-risk                                                                                              | 0.0305            | 0.5 – 6.0                | 2.764                      |
| HPV low-risk                                                                                                     | 0.0305            | 0.5 – 6.0                | 3.055                      |
| CIN 2,3 regression <sup>14, 15, 17 37</sup>                                                                      |                   |                          |                            |
| HPV-16                                                                                                           | 0.0014 – 0.0065   | 0.5 – 6.0                | 5.668                      |
| HPV-18                                                                                                           | 0.0014 – 0.0065   | 0.5 – 6.0                | 5.932                      |
| HPV other high-risk                                                                                              | 0.0014 – 0.0065   | 0.5 – 6.0                | 4.868                      |
| HPV low-risk                                                                                                     | 0.0014 – 0.0065   | 0.5 – 6.0                | 2.560                      |
| Probability that a woman will develop a natural immune response after first HPV infection and clearance          |                   |                          |                            |
| Any high-risk type                                                                                               | 1.0               | 0.95 – 1.0               | 0.998                      |
| Reduction in HPV incidence after same type infection and clearance, conditional on immune response <sup>39</sup> |                   |                          |                            |
| HPV-16                                                                                                           | 1.0               | 0.4 – 1.0                | 0.755                      |
| HPV-18                                                                                                           | 1.0               | 0.4 – 1.0                | 0.698                      |
| HPV other high-risk                                                                                              | 1.0               | 0 – 0.5                  | 0.334                      |
| Progression of invasive cancer stages <sup>10, 14, 17</sup> ¶                                                    |                   |                          |                            |
| Local to regional                                                                                                | 0.020             | na                       | na                         |
| Regional to distant                                                                                              | 0.025             | na                       | na                         |
| 5-year cervical cancer survival <sup>10</sup> ¶                                                                  |                   |                          |                            |
| Local                                                                                                            | 0.92              | na                       | na                         |
| Regional                                                                                                         | 0.56              | na                       | na                         |
| Distant                                                                                                          | 0.17              | na                       | na                         |
| Probability of symptom detection (annual) <sup>10</sup> ¶                                                        |                   |                          |                            |
| Local                                                                                                            | 0.19              | na                       | na                         |
| Regional                                                                                                         | 0.60              | na                       | na                         |
| Distant                                                                                                          | 0.90              | na                       | na                         |

\* HPV, human papillomavirus; CIN, cervical intraepithelial neoplasia. Baseline probabilities are monthly probabilities unless otherwise noted.

† Values of parameters prior to calibration; ranges represent age-specific probabilities.

‡ Values represent factors that were multiplied to the baseline probability.

§ 70% of women with CIN 1 regress to Normal, 30% to HPV.

|| 70% of women with CIN 2,3 regress to Normal, 15% to HPV, 15% to CIN 1.

¶ These model parameters were not included in the model calibration process.

## STOCHASTIC MODEL CALIBRATION TARGET DATA\*

| Calibration Target                                                   | Mean (SD)            | Mean (SD)            |
|----------------------------------------------------------------------|----------------------|----------------------|
| <b>Prevalence of HPV infection among women</b> <sup>22</sup>         | <b>Low-risk HPV</b>  | <b>High-risk HPV</b> |
| – 14-19 years                                                        | 0.145 (0.015)        | 0.188 (0.027)        |
| – 20-24 years                                                        | 0.325 (0.054)        | 0.295 (0.041)        |
| – 25-29 years                                                        | 0.223 (0.040)        | 0.150 (0.036)        |
| – 30-39 years                                                        | 0.200 (0.038)        | 0.179 (0.026)        |
| – 40-49 years                                                        | 0.153 (0.019)        | 0.149 (0.013)        |
| – 50-59 years                                                        | 0.175 (0.038)        | 0.078 (0.011)        |
| <b>HPV type distribution</b> <sup>23-26, 40</sup>                    |                      |                      |
| <i>Among women with CIN 1</i>                                        |                      |                      |
| HPV-16 and -18                                                       | 0.304 (0.051)        |                      |
| HPV other high-risk                                                  | 0.491 (0.051)        |                      |
| <i>Among women with CIN 2,3</i>                                      |                      |                      |
| HPV-16                                                               | 0.346 (0.051)        |                      |
| HPV-18                                                               | 0.090 (0.046)        |                      |
| HPV other high-risk                                                  | 0.510 (0.051)        |                      |
| <i>Among women with invasive cancer</i>                              |                      |                      |
| HPV-16                                                               | 0.551 (0.051)        |                      |
| HPV-18                                                               | 0.220 (0.051)        |                      |
| <b>Incidence rate of invasive cancer (per 100,000)</b> <sup>27</sup> | <b>All HPV types</b> |                      |
| – 20-24 years                                                        | 2.6 (1.4)            |                      |
| – 25-29 years                                                        | 13.5 (5.4)           |                      |
| – 30-34 years                                                        | 28.9 (7.8)           |                      |
| – 35-39 years                                                        | 36.4 (8.1)           |                      |
| – 40-44 years                                                        | 45.1 (8.1)           |                      |
| – 45-49 years                                                        | 46.1 (8.2)           |                      |
| – 50-54 years                                                        | 50.9 (9.9)           |                      |
| – 55-59 years                                                        | 54.4 (7.8)           |                      |
| – 60-64 years                                                        | 61.2 (11.3)          |                      |
| – 65-69 years                                                        | 66.4 (14.2)          |                      |
| – 70-74 years                                                        | 65.4 (15.5)          |                      |
| – 75-79 years                                                        | 63.1 (19.4)          |                      |

\* SD, standard deviation; HPV, human papillomavirus; CIN, cervical intraepithelial neoplasia, grade 1 (CIN 1) or grade 2,3 (CIN 2,3). All target data were assumed to follow normal distributions.

**MODEL CALIBRATION OUTPUT FROM A SAMPLE OF GOOD-FITTING SETS, COMPARED WITH EMPIRICAL DATA**

Red dotted lines represent model output for selected good-fitting set; gray lines represent model output for a sample of nine good-fitting sets. Black lines depict the 95% confidence interval of the empirical data at each age group.<sup>22-28</sup> “HRo” denotes other (non-16,-18) high-risk HPV types.

**A. Age-specific prevalence of HPV-16 and -18 among females from the dynamic model**

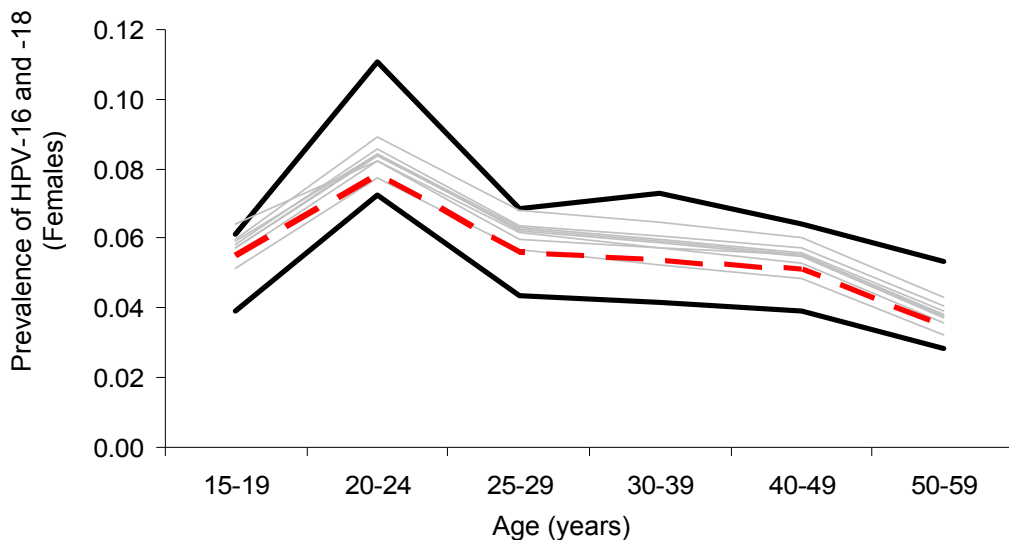

**B. Annual incidence of HPV-16 and -18 associated cervical cancer from the dynamic model**

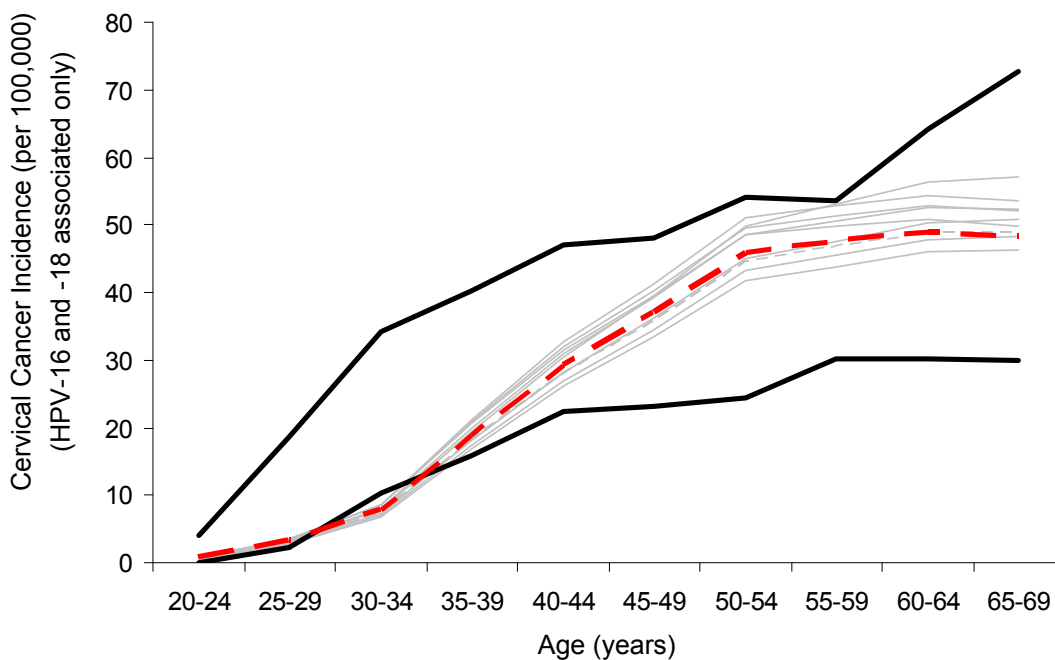

**C. Age-specific prevalence of HPV-16 and -18 among males from the dynamic model**

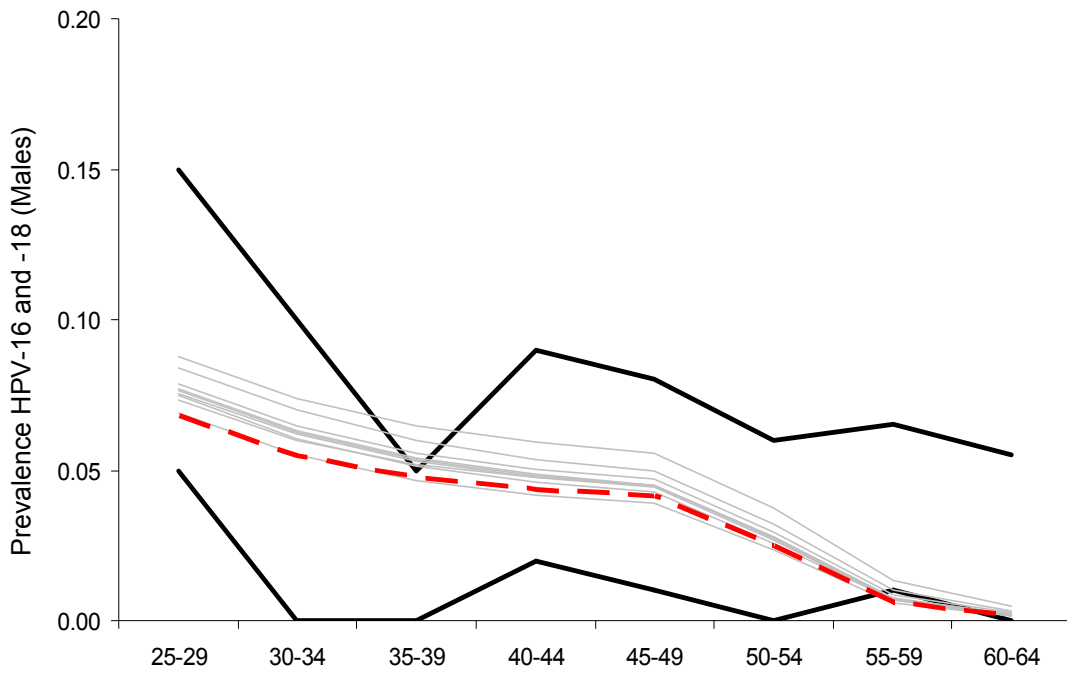

**D. HPV type distribution among females with CIN and invasive cancer from the stochastic model**

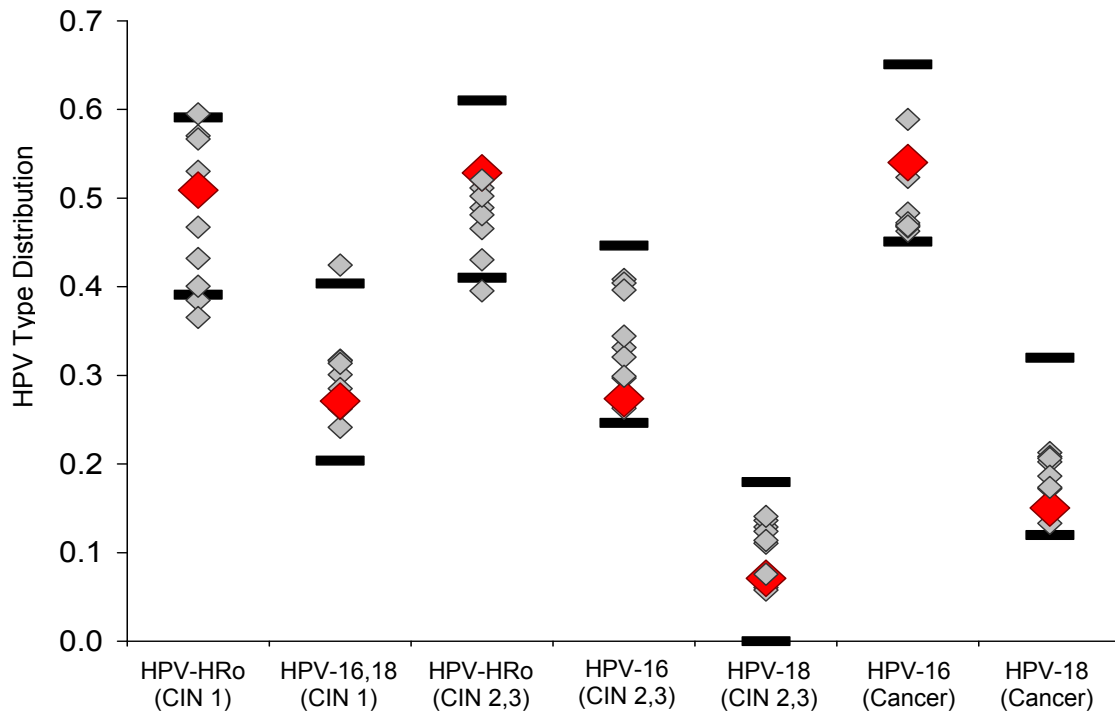

## ESTIMATION OF NON-CERVICAL CANCER OUTCOMES

We used an incidence-based method to estimate the impact on HPV-6,-11 genital warts, and the possible impacts on HPV-6,-11 JORRP, by the quadrivalent vaccine, as well as other HPV-16,-18 cancers by both the bivalent and quadrivalent vaccines. The data required for these calculations included annual incidence of disease (age-specific when possible), proportion of cases attributable to vaccine-targeted HPV types, average cost per case, excess mortality rates (for cancer cases only), and health state utilities for each condition (see **Table 1** in main manuscript). All disease-specific utilities were multiplied to baseline age-specific utilities to estimate overall utility.<sup>41</sup> For the HPV-16,-18 associated non-cervical cancers, the dynamic model was used to estimate both direct and indirect (i.e., herd immunity) benefits from vaccination; for HPV-6,-11 warts and JORRP, vaccination is assumed to reduce only the proportion of cases attributable to vaccine-targeted types. Because of the greater uncertainty about vaccine effects on other cancers and JORRP, we varied efficacy on these conditions from 50% to 100% in sensitivity analysis. We also varied the proportion of warts cases attributable to HPV-6,-11. These incidence models were run both without and with the vaccination strategies to generate estimates of quality-adjusted life years gained and costs averted with each vaccination strategy. Both costs and quality-adjusted life years were discounted at a rate of 3% per year.

### Genital Warts

Age-specific annual incidence of genital warts was based on data from a study of over 3 million members of a private health insurance plan.<sup>42</sup> Based on the same data,<sup>42</sup> duration of genital warts was assumed to be, on average, three months. Health state utility was 0.91 during the episode of warts.<sup>43</sup> Proportion of genital warts cases attributable to HPV-6 or -11 was assumed to be 100%.<sup>44</sup> Cost of treating an episode of warts was, on average, \$430 (2006 U.S. dollars), reflecting direct medical costs associated with physician office visits for diagnosis and treatment, as well as pharmacy costs for medications and analgesics.<sup>45</sup> Embedded in the cost was an assumption that 25% of cases cured spontaneously.

### Juvenile Onset Recurrent Respiratory Papillomatosis (JORRP)

For JORRP, we counted cases and costs averted as a benefit of vaccinated women whose future offspring would face a reduced risk of JORRP. We utilized age-specific birth rates per woman, and applied an annual incidence rate of JORRP per live child. Birth rates from 2006 were obtained from the U.S. National Vital Statistics Reports,<sup>3</sup> and annual incidence of JORRP was estimated from a survey of otolaryngologists in the U.S.<sup>46</sup> Proportion of JORRP cases attributable to HPV-6 or -11 was assumed to be 100%.<sup>44</sup> Health state utility was assumed to be 0.69.<sup>47</sup> Cost per case of JORRP was, on average, \$62,010 (2006 U.S. dollars), reflecting direct medical costs associated with surgery, follow-up physician visits, and tracheotomy.<sup>45</sup>

### Other Cancers

Data on age-specific incidence and overall 5-year survival for vulva, vaginal, anal, mouth, and oropharynx cancers were obtained from the U.S. SEER Cancer registry (1975-2001).<sup>10</sup> Proportion of cases for each cancer attributable to HPV-16,-18 were reported in a 2006 monograph focused on burden of all HPV types worldwide.<sup>48</sup> Health state utility for all cancers was assumed to be, on average, 0.68 over the remaining lifetime, to reflect a weighted average of stage-specific utilities and stage distribution of disease.<sup>49</sup> Cost per case included diagnosis (e.g., biopsy), initial treatment (e.g., surgery or radiation), surveillance, management of metastatic disease, and terminal care.<sup>45</sup>

## SUMMARY COMPARISON OF MODEL FEATURES

|                                              | Dynamic Model                                                                                                                          | Stochastic Model                                                                                                                                                                                                     | Incidence Models*                                                                                                                                                                                 |
|----------------------------------------------|----------------------------------------------------------------------------------------------------------------------------------------|----------------------------------------------------------------------------------------------------------------------------------------------------------------------------------------------------------------------|---------------------------------------------------------------------------------------------------------------------------------------------------------------------------------------------------|
| <b>HPV types included</b>                    | <ul style="list-style-type: none"> <li>▪ HPV-16</li> <li>▪ HPV-18</li> </ul>                                                           | <ul style="list-style-type: none"> <li>▪ HPV-16</li> <li>▪ HPV-18</li> <li>▪ Other High-Risk HPV</li> <li>▪ Low-Risk HPV</li> </ul>                                                                                  | <ul style="list-style-type: none"> <li>▪ HPV-16,-18</li> <li>▪ HPV-6,-11</li> </ul>                                                                                                               |
| <b>Health conditions</b>                     | <ul style="list-style-type: none"> <li>▪ HPV-16 and -18 incidence</li> </ul>                                                           | <ul style="list-style-type: none"> <li>▪ Cervical cancer associated with all HPV types</li> </ul>                                                                                                                    | <ul style="list-style-type: none"> <li>▪ Genital warts associated with HPV-6,-11</li> <li>▪ JORRP associated with HPV-6,-11</li> <li>▪ Non-cervical cancers associated with HPV-16,-18</li> </ul> |
| <b>Important outcomes with each strategy</b> | <ul style="list-style-type: none"> <li>▪ Age-specific reductions in HPV-16 and HPV-18 incidences of different birth cohorts</li> </ul> | <ul style="list-style-type: none"> <li>▪ Reductions in lifetime risk of cervical cancer</li> <li>▪ Discounted quality-adjusted life expectancy gained</li> <li>▪ Discounted total costs gained or averted</li> </ul> | <ul style="list-style-type: none"> <li>▪ Discounted quality-adjusted life expectancy gained</li> <li>▪ Discounted total costs averted</li> </ul>                                                  |

\* Separate incidence models were developed for each of the non-cervical cancer health conditions.

## A QUALITATIVE DESCRIPTION OF PROJECTED INFLUENCE OF INCLUDING DIFFERENT DISEASE OUTCOMES ON THE COST-EFFECTIVENESS RATIO

|                   | Incidence without any intervention | Existing preventive intervention? | Incidence in setting of status quo intervention | Efficacy of the HPV vaccine |
|-------------------|------------------------------------|-----------------------------------|-------------------------------------------------|-----------------------------|
| Cervical cancer   | Low                                | Yes (screening)                   | Very low                                        | High                        |
| Genital warts     | High                               | No                                | unchanged                                       | High                        |
| JORRP             | Very low                           | No                                | unchanged                                       | Uncertain                   |
| Other HPV cancers | Very low                           | No                                | unchanged                                       | Uncertain                   |

## VACCINE ANALYSIS

We evaluated all strategies over the first 10 years of the vaccination program by simulating their impact over the lifetimes of all birth cohorts that are sexually active throughout those 10 years. For example, at program year 1 ( $t=1$ ), the vaccine is introduced to girls who are 12 years old at that time. Even though a strategy without catch-up does not include vaccination of girls who are 13 years old at  $t=1$ , we model the 13-year-old cohort because they may reap downstream indirect benefits from herd immunity; same for girls who are older in that same year. At program year 2 ( $t=2$ ), a new cohort of 12-year-old girls is vaccinated, and we include their life histories in the analysis. We include incoming 12-year-old girls through program year 10 ( $t=10$ ). Essentially, for each strategy, we evaluate 38 birth cohorts in vaccine year 1 (girls who are ages 12 through 49, since we assume acquisition of new partners ceases after age 49), and then the 9 additional cohorts of 12-year-old girls that are vaccinated each year until program year 10. We repeat this analysis for each strategy because the level of herd immunity benefits (as well as direct benefits) for the included birth cohorts will differ by catch-up strategy.

Strategies include HPV vaccination of 12-year-old girls, and catch-up vaccination over a five-year period for females from age 13 up to 18, 21, or 26. We assume that approximately 75% of the target population is covered within the first five years of the vaccination program, at a coverage rate of 25% per year. For example, without a catch-up program, 25% of the initial 12-year-old birth cohort at vaccination program year 1 are covered with no opportunities for vaccination in future years. In strategies with a catch-up program, however, an additional 25% of the initial 12-year-old cohort who were not vaccinated in the first year have another opportunity to be vaccinated in the second year of the program, when they are 13 years old; such opportunities continue through program year 5. The number of vaccination opportunities depends on the specific catch-up strategy; for example, a 16-year-old in the first year of the program will have only three chances of being vaccinated in a catch-up program up to age 18, since she will age beyond 18 in program year 4.

## SCREENING ASSUMPTIONS

All strategies include routine cervical cancer screening with conventional or liquid-based cytology, beginning at an average age of 20, based on U.S. guidelines that recommend screening start three years after sexual debut.<sup>11, 50</sup> Women with cytology results of atypical squamous cells of undetermined significance (ASCUS) are managed using triage HPV DNA testing; those who test positive for high-risk types of HPV receive colposcopy and/or biopsy, while those who test negative return to routine screening. Women with positive cytology results are referred for colposcopy and/or biopsy; those with histologically confirmed CIN 1 are not treated but monitored every 6-12 months until they have three negative screening tests. Women with a positive diagnosis for CIN 2,3 or invasive cancer are treated according to standard guidelines.<sup>51</sup> Women with any confirmed abnormality, even if treated successfully for CIN, are screened annually until there are three consecutive negative results.

Based on cervical cancer screening patterns reported for U.S. women,<sup>52</sup> we assume that 53% of women are screened annually, 17% are screened every two years, 11% are screened every three years, 14% are screened every five years, and 5% are never screened. According to the 2005 NHIS survey,<sup>52</sup> 9% of women had not been screened at all in the past six years; we split that group into 5% who are never screened in their lifetime, and assume the remaining 4% are screened every five years. The survey also indicated that 9% of women were screened less than triennially, and we assume that all of those women are screened every five years.

## CERVICAL CANCER SCREENING AND COST PARAMETERS \*

| Variable                                                     | Baseline values                                                            |
|--------------------------------------------------------------|----------------------------------------------------------------------------|
| Frequency of screening (percent of population) <sup>52</sup> | 1-year (53%)<br>2-year (17%)<br>3-year (11%)<br>5-year (14%)<br>Never (5%) |
| Test characteristics (%)                                     |                                                                            |
| Cytology <sup>53-55</sup> †                                  |                                                                            |
| Sensitivity (CIN 1/CIN 2,3)                                  | 70/80                                                                      |
| Specificity                                                  | 95                                                                         |
| HPV DNA test <sup>55, 56</sup> ‡                             |                                                                            |
| Sensitivity (CIN 1/CIN 2,3)                                  | 83/93                                                                      |
| Specificity                                                  | 93                                                                         |
| Costs (2006 US dollars) §                                    |                                                                            |
| HPV vaccine (per dose) <sup>57-60</sup>                      |                                                                            |
| Vaccine and wastage                                          | 134                                                                        |
| Supplies and administration                                  | 9                                                                          |
| Patient time and transport                                   | 24                                                                         |
| Screening test <sup>61-65</sup>                              |                                                                            |
| Cytology                                                     | 32                                                                         |
| HPV DNA test (Hybrid Capture II)                             | 49                                                                         |
| Office visit                                                 | 27                                                                         |
| Patient time and transport                                   | 26                                                                         |
| Diagnostic follow-up <sup>61-64</sup>                        |                                                                            |
| Colposcopy                                                   | 364                                                                        |
| Biopsy                                                       | 53                                                                         |
| Office visit                                                 | 61                                                                         |
| Patient time and transport                                   | 51                                                                         |
| Treatment for CIN 2,3 <sup>62</sup> ¶                        | 3,438                                                                      |
| Treatment for cervical cancer <sup>62</sup> ¶                |                                                                            |
| Local invasive cancer                                        | 26,540                                                                     |
| Regional invasive cancer                                     | 28,430                                                                     |
| Distant invasive cancer                                      | 45,540                                                                     |

\* CIN, cervical intraepithelial neoplasia, grade 1 (CIN 1) or grade 2,3 (CIN 2,3); HPV, human papillomavirus.

† 50% of women are assumed to receive conventional cytology, and 50% liquid-based cytology. Sensitivity for detecting CIN 2,3 was calculated as the weighted average of values from two recent studies reporting conventional and liquid-based cytology sensitivities using an ASCUS+ threshold. <sup>54, 55</sup>

‡ HPV DNA testing is assumed to be 100% sensitive (specific) in detecting the presence (absence) of high-risk HPV types. When this assumption is made, the model generates an implied clinical sensitivity for detecting CIN 1 and CIN 2,3 of 83.0% and 93.0%, respectively, and specificity of 93.0%.

§ Costs were inflation-adjusted to constant 2006 U.S. dollars (USD) using the medical component of the Consumer Price Index. <sup>66</sup>

|| Vaccination assumes three doses; cost per-vaccinated individual is \$500.

¶ Treatment costs were inclusive of cost of procedures, office visit, and woman's time and transport.

## MODEL VALIDATION AGAINST VACCINE CLINICAL TRIAL RESULTS

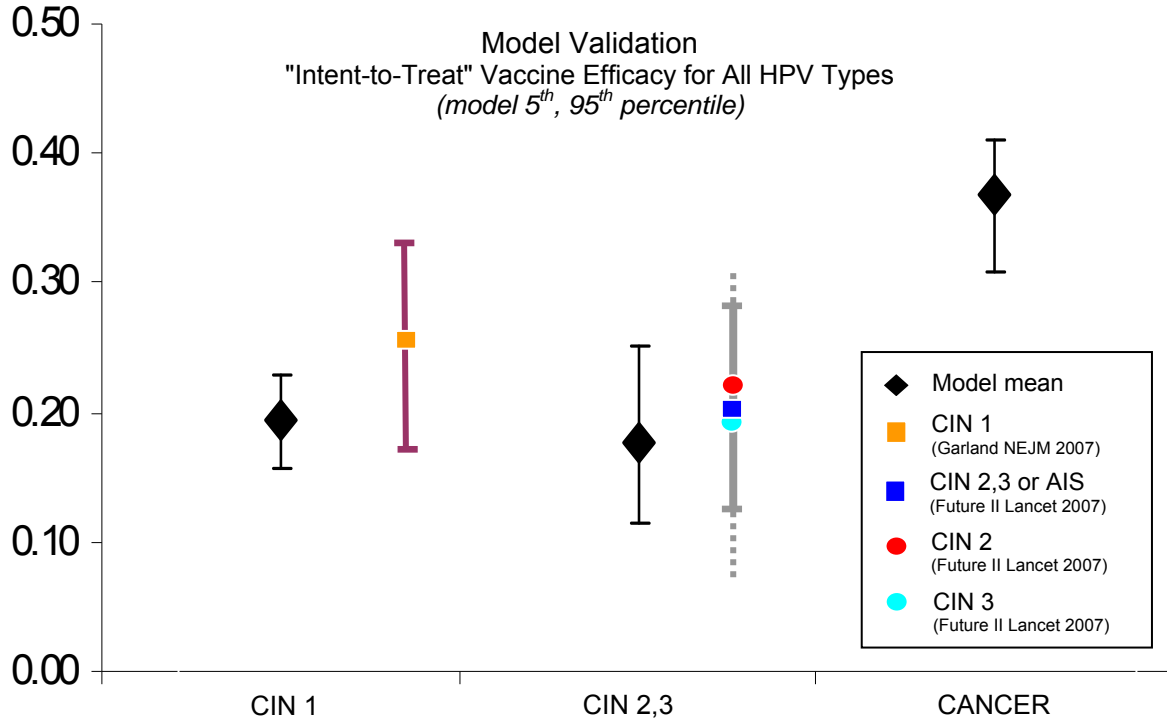

## ADDITIONAL RESULTS

### EFFECT OF GENITAL WARTS CASES ATTRIBUTABLE TO HPV-6,-11 \*

| Strategy †                              | 100%<br>(Base Case) | 75%     |
|-----------------------------------------|---------------------|---------|
| Screening alone                         | --                  | --      |
| Vaccination (age 12)                    | 34,900              | 36,900  |
| Vaccination (age 12) + catch-up (13-18) | 81,000              | 84,600  |
| Vaccination (age 12) + catch-up (13-21) | 101,300             | 105,500 |
| Vaccination (age 12) + catch-up (13-26) | 133,600             | 138,000 |

\* Values represent incremental cost-effectiveness ratios (additional cost divided by additional health benefit compared to the next-less-costly strategy), expressed as cost per quality-adjusted life year (\$ per QALY). Analyses include outcomes related to cervical cancer and genital warts among females. All costs are expressed in 2006 U.S. dollars.

† All strategies include current cytology screening (see Methods section in main manuscript for details).

### EFFECT OF REVISED CERVICAL CANCER SCREENING POLICIES \*

| Strategy                                | Base Case † | Revised<br>Screening ‡<br>(3-year) | Revised<br>Screening ‡<br>(5-year) |
|-----------------------------------------|-------------|------------------------------------|------------------------------------|
| Screening alone                         | --          | --                                 | --                                 |
| Vaccination (age 12)                    | 43,600      | 40,900                             | 28,200                             |
| Vaccination (age 12) + catch-up (13-18) | 97,300      | 103,500                            | 68,900                             |
| Vaccination (age 12) + catch-up (13-21) | 120,400     | 128,700                            | 89,000                             |
| Vaccination (age 12) + catch-up (13-26) | 152,700     | 185,400                            | 123,500                            |

\* Values represent incremental cost-effectiveness ratios (additional cost divided by additional health benefit compared to the next-less-costly strategy), expressed as cost per quality-adjusted life year (\$ per QALY). All analyses include outcomes related to cervical cancer only. All costs are expressed in 2006 U.S. dollars.

† The base-case analysis assumes current cytology screening (see Methods section in main manuscript for details).

‡ The analyses assume cytology with HPV DNA testing as triage starting at age 25, with a switch to cytology combined with HPV DNA testing starting at age 35, every 3 or every 5 years.

## REFERENCES

1. Barnabas RV, Laukkanen P, Koskela P, Kontula O, Lehtinen M, Garnett GP. Epidemiology of HPV 16 and cervical cancer in Finland and the potential impact of vaccination: mathematical modelling analyses. *PLoS Med* 2006;3:e138.
2. U.S. Census Bureau. Population Estimates Program, Population Division. 2000. (Accessed July 25, 2008 at <http://www.census.gov/ipc/www/idb/summaries.html>).
3. Hamilton BE, Martin JA, Ventura SJ. Births: preliminary data for 2006. *Natl Vital Stat Rep* 2007;55:1-18.
4. Harper DM, Franco EL, Wheeler CM, et al. Sustained efficacy up to 4.5 years of a bivalent L1 virus-like particle vaccine against human papillomavirus types 16 and 18: follow-up from a randomised control trial. *Lancet* 2006;367:1247-55.
5. Ault KA. Effect of prophylactic human papillomavirus L1 virus-like-particle vaccine on risk of cervical intraepithelial neoplasia grade 2, grade 3, and adenocarcinoma in situ: a combined analysis of four randomised clinical trials. *Lancet* 2007;369:1861-8.
6. Quadrivalent vaccine against human papillomavirus to prevent high-grade cervical lesions. *N Engl J Med* 2007;356:1915-27.
7. Garland SM, Hernandez-Avila M, Wheeler CM, et al. Quadrivalent vaccine against human papillomavirus to prevent anogenital diseases. *N Engl J Med* 2007;356:1928-43.
8. Paavonen J, Jenkins D, Bosch FX, et al. Efficacy of a prophylactic adjuvanted bivalent L1 virus-like-particle vaccine against infection with human papillomavirus types 16 and 18 in young women: an interim analysis of a phase III double-blind, randomised controlled trial. *Lancet* 2007;369:2161-70.
9. National Center for Health Statistics. United States Life Tables, 2003. (Accessed July 25, 2008, at <http://www.cdc.gov/nchs/products/pubs/pubd/lftbls/life/1966.htm>).
10. National Cancer Institute. Surveillance, Epidemiology, End Results (SEER) Cancer Statistics Review, 1975-2001. 2005. (Accessed July 25, 2008, at [http://seer.cancer.gov/csr/1975\\_2001/](http://seer.cancer.gov/csr/1975_2001/)).
11. Mosher WD, Chandra A, Jones J. Sexual behavior and selected health measures: men and women 15-44 years of age, United States, 2002. *Adv Data* 2005:1-55.
12. Ho GY, Burk RD, Klein S, et al. Persistent genital human papillomavirus infection as a risk factor for persistent cervical dysplasia. *J Natl Cancer Inst* 1995;87:1365-71.
13. Londesborough P, Ho L, Terry G, Cuzick J, Wheeler C, Singer A. Human papillomavirus genotype as a predictor of persistence and development of high-grade lesions in women with minor cervical abnormalities. *Int J Cancer* 1996;69:364-8.
14. McCrory D, Mather D, Bastian L, et al. Evaluation of Cervical Cytology. Evidence Report/Technology Assessment No. 5. Rockville: AHCPH; 1999 February 1999. Report No.: Publication No. 99-E010.
15. Schlecht NF, Platt RW, Duarte-Franco E, et al. Human papillomavirus infection and time to progression and regression of cervical intraepithelial neoplasia. *J Natl Cancer Inst* 2003;95:1336-43.
16. Franco EL, Villa LL, Sobrinho JP, et al. Epidemiology of acquisition and clearance of cervical human papillomavirus infection in women from a high-risk area for cervical cancer. *J Infect Dis* 1999;180:1415-23.
17. Myers ER, McCrory DC, Nanda K, Bastian L, Matchar DB. Mathematical model for the natural history of human papillomavirus infection and cervical carcinogenesis. *Am J Epidemiol* 2000;151:1158-71.
18. Ho GY, Kadish AS, Burk RD, et al. HPV 16 and cigarette smoking as risk factors for high-grade cervical intra-epithelial neoplasia. *Int J Cancer* 1998;78:281-5.

19. Koutsky LA, Holmes KK, Critchlow CW, et al. A cohort study of the risk of cervical intraepithelial neoplasia grade 2 or 3 in relation to papillomavirus infection. *N Engl J Med* 1992;327:1272-8.
20. Nobbenhuis MA, Walboomers JM, Helmerhorst TJ, et al. Relation of human papillomavirus status to cervical lesions and consequences for cervical-cancer screening: a prospective study. *Lancet* 1999;354:20-5.
21. Remmink AJ, Walboomers JM, Helmerhorst TJ, et al. The presence of persistent high-risk HPV genotypes in dysplastic cervical lesions is associated with progressive disease: natural history up to 36 months. *Int J Cancer* 1995;61:306-11.
22. Dunne EF, Unger ER, Sternberg M, et al. Prevalence of HPV infection among females in the United States. *Jama* 2007;297:813-9.
23. Clifford G, Franceschi S, Diaz M, Munoz N, Villa LL. Chapter 3: HPV type-distribution in women with and without cervical neoplastic diseases. *Vaccine* 2006;24 Suppl 3:S26-34.
24. Clifford GM, Gallus S, Herrero R, et al. Worldwide distribution of human papillomavirus types in cytologically normal women in the International Agency for Research on Cancer HPV prevalence surveys: a pooled analysis. *Lancet* 2005;366:991-8.
25. Clifford GM, Smith JS, Aguado T, Franceschi S. Comparison of HPV type distribution in high-grade cervical lesions and cervical cancer: a meta-analysis. *Br J Cancer* 2003;89:101-5.
26. Clifford GM, Smith JS, Plummer M, Munoz N, Franceschi S. Human papillomavirus types in invasive cervical cancer worldwide: a meta-analysis. *Br J Cancer* 2003;88:63-73.
27. International Union against Cancer. *Cancer Incidence in Five Continents*, vol. 1. New York: Springer-Verlag; 1966.
28. Franceschi S, Castellsague X, DalMaso L, et al. Prevalence and determinants of human papillomavirus genital infection in men. *Br J Cancer* 2002;86:705-11.
29. Dasbach EJ, Elbasha EH, Insinga RP. Mathematical models for predicting the epidemiologic and economic impact of vaccination against human papillomavirus infection and disease. *Epidemiol Rev* 2006;28:88-100.
30. Kim JJ, Kuntz KM, Stout NK, et al. Multiparameter calibration of a natural history model of cervical cancer. *Am J Epidemiol* 2007;166:137-50.
31. Goldie SJ, Kim JJ, Kobus K, et al. Cost-effectiveness of HPV 16, 18 vaccination in Brazil. *Vaccine* 2007;25:6257-70.
32. Munoz N, Mendez F, Posso H, et al. Incidence, duration, and determinants of cervical human papillomavirus infection in a cohort of Colombian women with normal cytological results. *J Infect Dis* 2004;190:2077-87.
33. Hildesheim A, Schiffman MH, Gravitt PE, et al. Persistence of type-specific human papillomavirus infection among cytologically normal women. *J Infect Dis* 1994;169:235-40.
34. Ho GY, Bierman R, Beardsley L, Chang CJ, Burk RD. Natural history of cervicovaginal papillomavirus infection in young women. *N Engl J Med* 1998;338:423-8.
35. Liu T, Soong SJ, Alvarez RD, Butterworth CE, Jr. A longitudinal analysis of human papillomavirus 16 infection, nutritional status, and cervical dysplasia progression. *Cancer Epidemiol Biomarkers Prev* 1995;4:373-80.
36. Syrjanen K, Kataja V, Yliskoski M, Chang F, Syrjanen S, Saarikoski S. Natural history of cervical human papillomavirus lesions does not substantiate the biologic relevance of the Bethesda System. *Obstet Gynecol* 1992;79:675-82.
37. Ostor AG. Natural history of cervical intraepithelial neoplasia: a critical review. *Int J Gynecol Pathol* 1993;12:186-92.
38. Melnikow J, Nuovo J, Willan AR, Chan BK, Howell LP. Natural history of cervical squamous intraepithelial lesions: a meta-analysis. *Obstet Gynecol* 1998;92:727-35.
39. Ho GY, Studentsov Y, Hall CB, et al. Risk factors for subsequent cervicovaginal human papillomavirus (HPV) infection and the protective role of antibodies to HPV-16 virus-like particles. *J Infect Dis* 2002;186:737-42.

40. Clifford GM, Rana RK, Franceschi S, Smith JS, Gough G, Pimenta JM. Human papillomavirus genotype distribution in low-grade cervical lesions: comparison by geographic region and with cervical cancer. *Cancer Epidemiol Biomarkers Prev* 2005;14:1157-64.
41. Fryback DG, Dasbach EJ, Klein R, et al. The Beaver Dam Health Outcomes Study: initial catalog of health-state quality factors. *Med Decis Making* 1993;13:89-102.
42. Insinga RP, Dasbach EJ, Myers ER. The health and economic burden of genital warts in a set of private health plans in the United States. *Clin Infect Dis* 2003;36:1397-403.
43. Myers ER, Green S, Lipkus I. Patient preferences for health states related to HPV infection: visual analogue scales versus time trade-off elicitation [abstract]. In: *Proceedings of the 21st International Papillomavirus Conference*. Mexico City, Mexico; 2004.
44. Lacey CJ, Lowndes CM, Shah KV. Chapter 4: Burden and management of non-cancerous HPV-related conditions: HPV-6/11 disease. *Vaccine* 2006;24 Suppl 3:S35-41.
45. Hu D, Goldie SJ. The economic burden of noncervical human papillomavirus disease in the United States. *Am J Obstet Gynecol* 2008;198:500.e1-500.e7.
46. Derkey CS. Task force on recurrent respiratory papillomas. A preliminary report. *Arch Otolaryngol Head Neck Surg* 1995;121:1386-91.
47. Bishai D, Kashima H, Shah K. The cost of juvenile-onset recurrent respiratory papillomatosis. *Arch Otolaryngol Head Neck Surg* 2000;126:935-9.
48. Parkin DM, Bray F. Chapter 2: The burden of HPV-related cancers. *Vaccine* 2006;24 Suppl 3:S11-25.
49. Gold MR, Franks P, McCoy KI, Fryback DG. Toward consistency in cost-utility analyses: using national measures to create condition-specific values. *Med Care* 1998;36:778-92.
50. Saslow D, Runowicz CD, Solomon D, et al. American Cancer Society guideline for the early detection of cervical neoplasia and cancer. *CA Cancer J Clin* 2002;52:342-62.
51. Wright TC, Jr., Massad LS, Dunton CJ, Spitzer M, Wilkinson EJ, Solomon D. 2006 consensus guidelines for the management of women with abnormal cervical cancer screening tests. *Am J Obstet Gynecol* 2007;197:346-55.
52. Eltoun IA, Roberson J. Impact of HPV testing, HPV vaccine development, and changing screening frequency on national Pap test volume: projections from the National Health Interview Survey (NHIS). *Cancer* 2007;111:34-40.
53. Nanda K, McCrory DC, Myers ER, et al. Accuracy of the Papanicolaou test in screening for and follow-up of cervical cytologic abnormalities: a systematic review. *Ann Intern Med* 2000;132:810-9.
54. Arbyn M, Bergeron C, Klinkhamer P, Martin-Hirsch P, Siebers AG, Bulten J. Liquid compared with conventional cervical cytology: a systematic review and meta-analysis. *Obstet Gynecol* 2008;111:167-77.
55. Mayrand MH, Duarte-Franco E, Rodrigues I, et al. Human papillomavirus DNA versus Papanicolaou screening tests for cervical cancer. *N Engl J Med* 2007;357:1579-88.
56. Wright TC, Jr., Schiffman M, Solomon D, et al. Interim guidance for the use of human papillomavirus DNA testing as an adjunct to cervical cytology for screening. *Obstet Gynecol* 2004;103:304-9.
57. U.S. Centers for Disease Control and Prevention. HPV Vaccine Questions and Answers. 2006. (Accessed July 2, 2008, at <http://www.cdc.gov/std/hpv/STDFact-HPV-vaccine.htm#hpvvac4>).
58. Wallace LA, Young D, Brown A, et al. Costs of running a universal adolescent hepatitis B vaccination programme. *Vaccine* 2005;23:5624-31.
59. Iskedjian M, Walker JH, Hemels ME. Economic evaluation of an extended acellular pertussis vaccine programme for adolescents in Ontario, Canada. *Vaccine* 2004;22:4215-27.
60. Revised guidelines for HIV counseling, testing, and referral. *MMWR Recomm Rep* 2001;50(RR-19):1-58.

61. Kulasingam SL, Kim JJ, Lawrence WF, et al. Cost-effectiveness analysis based on the atypical squamous cells of undetermined significance/low-grade squamous intraepithelial lesion Triage Study (ALTS). *J Natl Cancer Inst* 2006;98:92-100.
62. Goldie SJ, Kim JJ, Wright TC. Cost-effectiveness of human papillomavirus DNA testing for cervical cancer screening in women aged 30 years or more. *Obstet Gynecol* 2004;103:619-31.
63. Cantor SB, Levy LB, Cardenas-Turanzas M, et al. Collecting direct non-health care and time cost data: application to screening and diagnosis of cervical cancer. *Med Decis Making* 2006;26:265-72.
64. Shireman TI, Tsevat J, Goldie SJ. Time costs associated with cervical cancer screening. *Int J Technol Assess Health Care* 2001;17:146-52.
65. Centers for Medicare and Medicaid Services. 2006 Clinical Lab Fee Schedule. (Accessed July 25, 2008, at [http://www.cms.hhs.gov/ClinicalLabFeeSched/02\\_clinlab.asp#TopOfPage](http://www.cms.hhs.gov/ClinicalLabFeeSched/02_clinlab.asp#TopOfPage)).
66. U.S. Bureau of Labor Statistics. Consumer Price Index, Medical Care Component. U.S. Department of Labor, 2006. (Accessed July 25, 2008, at <http://www.bls.gov/cpi/#data>).
